# Supplementary material for: Genome-Wide Identification and Characterization of the PP2C Family from Zea mays and Its Role in Long-Distance Signaling
Source: MDPI journal article supplement (doi:10.3390/plants12173153), 2023-09-01
Supplement: s1 [file s1]

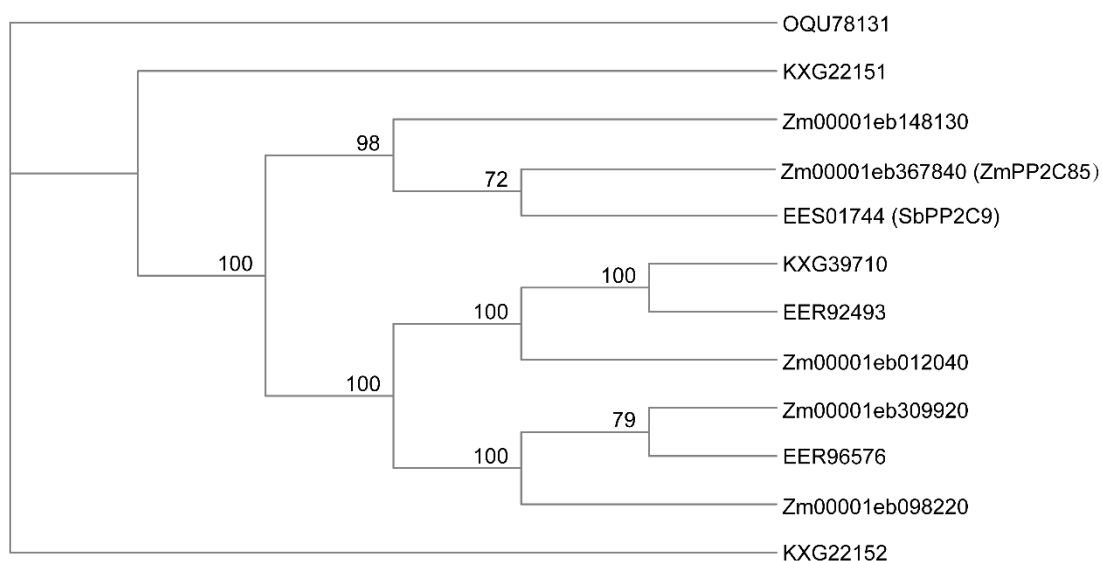

**Figure S5.** The evolutionary tree was constructed using TBtool software.

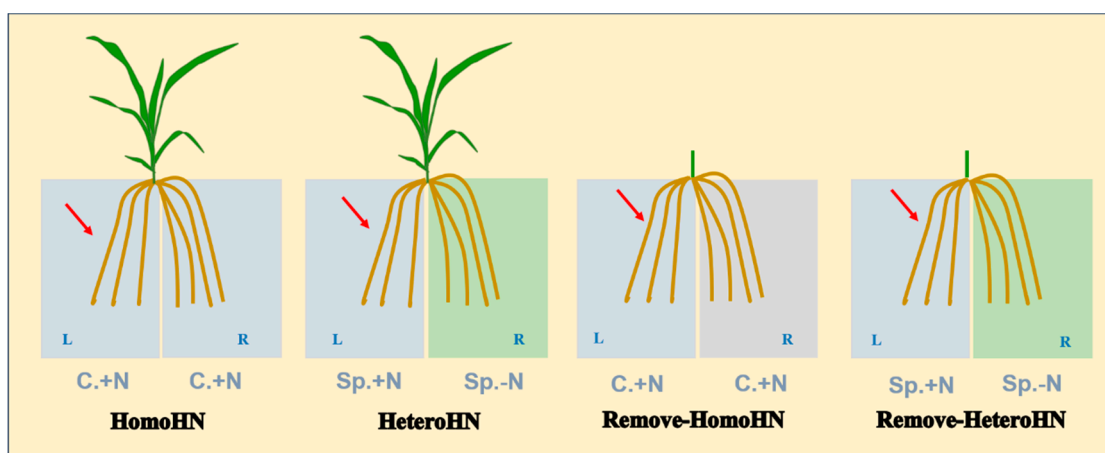

**Figure S6.** Split-root system in which the root system of a plant is separated into left (L) and right (R) parts that are exposed to different nutrient conditions. The red arrow points to the sampled tissue.

**Table S1.** Properties and predicted locations of ZmPP2C proteins.

| Gene_name | Chr | Chr<br>location | Ch<br>ain | Numb<br>er<br>of<br>amino | Instabi<br>lity<br>index | Theoretic<br>al pI | Molecular<br>weight (kDa) | Subcellular<br>location |
|-----------|-----|-----------------|-----------|---------------------------|--------------------------|--------------------|---------------------------|-------------------------|
|-----------|-----|-----------------|-----------|---------------------------|--------------------------|--------------------|---------------------------|-------------------------|

| acids    |   |                             |   |     |       |      |       |                  |
|----------|---|-----------------------------|---|-----|-------|------|-------|------------------|
| ZmPP2C01 | 1 | 8216041-<br>8220640         | + | 357 | 45.9  | 7.7  | 39.95 | Nucleus.         |
| ZmPP2C02 | 1 | 8222270-<br>8226801         | - | 399 | 48.18 | 8.47 | 44.16 | Nucleus.         |
| ZmPP2C03 | 1 | 8237814-<br>8243635         | + | 399 | 48.16 | 8.69 | 44.07 | Nucleus.         |
| ZmPP2C04 | 1 | 39067264-<br>39069360       | - | 396 | 61.22 | 6.43 | 42.04 | Nucleus.         |
| ZmPP2C05 | 1 | 40463650-<br>40466683       | + | 740 | 51.38 | 7.62 | 81.28 | Nucleus.         |
| ZmPP2C06 | 1 | 45160373-<br>45162447       | + | 388 | 60.55 | 6.18 | 40.79 | Nucleus.         |
| ZmPP2C07 | 1 | 64567706-<br>64576354       | + | 962 | 51.43 | 6.04 | 106.3 | Nucleus.         |
| ZmPP2C08 | 1 | 69007071-<br>69011416       | + | 440 | 40.37 | 5.67 | 47.36 | Nucleus.         |
| ZmPP2C09 | 1 | 188239653<br>-<br>188244354 | - | 515 | 42.56 | 5.1  | 55.05 | Nucleus.         |
| ZmPP2C10 | 1 | 285863639<br>-<br>285867090 | - | 376 | 40.05 | 9.66 | 41.02 | Nucleus.         |
| ZmPP2C11 | 1 | 300484734<br>-<br>300488297 | - | 615 | 49.22 | 5.99 | 66.29 | Chloroplast<br>. |
| ZmPP2C12 | 1 | 302449509<br>-<br>302453159 | - | 379 | 37.54 | 6.83 | 41.05 | Nucleus.         |
| ZmPP2C13 | 2 | 4263315-<br>4267702         | + | 284 | 33.89 | 4.46 | 30.66 | Nucleus.         |
| ZmPP2C14 | 2 | 11409181-<br>11413754       | + | 315 | 40.17 | 8.66 | 34.16 | Nucleus.         |
| ZmPP2C15 | 2 | 15309005-<br>15312211       | + | 392 | 44.13 | 6.63 | 43.69 | Chloroplast<br>. |
| ZmPP2C16 | 2 | 46187668-<br>46192641       | + | 444 | 50.22 | 5.98 | 47.36 | Nucleus.         |
| ZmPP2C17 | 2 | 62682531-<br>62686631       | + | 521 | 44.28 | 4.62 | 57.48 | Chloroplast<br>. |
| ZmPP2C18 | 2 | 106146629<br>-<br>106150713 | + | 457 | 62.3  | 5.71 | 49.04 | Nucleus.         |
| ZmPP2C19 | 2 | 156948040                   | - | 473 | 41.99 | 5    | 51.02 | Chloroplast      |

|          |   |           |   |     |       |      |       |                   |
|----------|---|-----------|---|-----|-------|------|-------|-------------------|
|          |   | -         |   |     |       |      |       | .                 |
|          |   | 156950830 |   |     |       |      |       |                   |
| ZmPP2C20 | 2 | 165213344 | - | 581 | 52.69 | 6.65 | 63.72 | Chloroplast       |
|          |   | -         |   |     |       |      |       | .                 |
|          |   | 165220565 |   |     |       |      |       |                   |
| ZmPP2C21 | 2 | 180274627 | + | 350 | 62    | 6.77 | 36.96 | Nucleus.          |
|          |   | -         |   |     |       |      |       |                   |
|          |   | 180276009 |   |     |       |      |       |                   |
| ZmPP2C22 | 2 | 209737398 | + | 306 | 42.08 | 6.45 | 33.35 | Nucleus.          |
|          |   | -         |   |     |       |      |       |                   |
|          |   | 209739063 |   |     |       |      |       |                   |
| ZmPP2C23 | 2 | 212637710 | - | 329 | 46.68 | 8.96 | 35.9  | Cell<br>membrane. |
|          |   | -         |   |     |       |      |       |                   |
|          |   | 212640699 |   |     |       |      |       |                   |
| ZmPP2C24 | 2 | 217993093 | + | 146 | 44.13 | 4.64 | 16.26 | Nucleus.          |
|          |   | -         |   |     |       |      |       |                   |
|          |   | 217995851 |   |     |       |      |       |                   |
| ZmPP2C25 | 2 | 220861770 | - | 454 | 47.05 | 4.82 | 47.5  | Chloroplast       |
|          |   | -         |   |     |       |      |       | .                 |
|          |   | 220866133 |   |     |       |      |       |                   |
| ZmPP2C26 | 2 | 224728063 | + | 429 | 44.46 | 7.94 | 46.1  | Nucleus.          |
|          |   | -         |   |     |       |      |       |                   |
|          |   | 224731366 |   |     |       |      |       |                   |
| ZmPP2C27 | 2 | 226054557 | + | 429 | 45.08 | 7.37 | 44.57 | Chloroplast       |
|          |   | -         |   |     |       |      |       | .                 |
|          |   | 226057199 |   |     |       |      |       |                   |
| ZmPP2C28 | 3 | 75762675- | - | 484 | 42.94 | 7.66 | 51.52 | Nucleus.          |
|          |   | 75779291  |   |     |       |      |       |                   |
| ZmPP2C29 | 3 | 185093948 | - | 408 | 58.76 | 5.92 | 43.28 | Nucleus.          |
|          |   | -         |   |     |       |      |       |                   |
|          |   | 185095922 |   |     |       |      |       |                   |
| ZmPP2C30 | 3 | 218456535 | - | 410 | 48.54 | 6.11 | 43.44 | Nucleus.          |
|          |   | -         |   |     |       |      |       |                   |
|          |   | 218462539 |   |     |       |      |       |                   |
| ZmPP2C31 | 3 | 226455074 | + | 484 | 44.71 | 4.48 | 50.7  | Chloroplast       |
|          |   | -         |   |     |       |      |       | .                 |
|          |   | 226460821 |   |     |       |      |       |                   |
| ZmPP2C32 | 3 | 232736476 | + | 384 | 39.44 | 5.29 | 41.19 | Chloroplast       |
|          |   | -         |   |     |       |      |       | .                 |
|          |   | 232740529 |   |     |       |      |       |                   |
| ZmPP2C33 | 4 | 11862186- | + | 436 | 50.66 | 6.71 | 45.46 | Chloroplast       |
|          |   | 11864645  |   |     |       |      |       | .                 |
| ZmPP2C34 | 4 | 11872182- | + | 106 | 26.24 | 7.03 | 11.07 | Nucleus.          |
|          |   | 11874449  |   |     |       |      |       |                   |

|          |   |           |   |      |       |      |       |             |
|----------|---|-----------|---|------|-------|------|-------|-------------|
| ZmPP2C35 | 4 | 104502063 | - | 458  | 38.13 | 6.66 | 49.97 | Chloroplast |
|          |   | -         |   |      |       |      |       | .           |
|          |   | 104516614 |   |      |       |      |       |             |
| ZmPP2C36 | 4 | 127220133 | - | 449  | 58.85 | 6.41 | 48.22 | Nucleus.    |
|          |   | -         |   |      |       |      |       |             |
|          |   | 127245164 |   |      |       |      |       |             |
| ZmPP2C37 | 4 | 204429970 | - | 523  | 41.37 | 4.89 | 56.37 | Nucleus.    |
|          |   | -         |   |      |       |      |       |             |
|          |   | 204434309 |   |      |       |      |       |             |
| ZmPP2C38 | 4 | 225770293 | + | 500  | 36.5  | 7.94 | 53.21 | Chloroplast |
|          |   | -         |   |      |       |      |       | .           |
|          |   | 225784317 |   |      |       |      |       |             |
| ZmPP2C39 | 4 | 228511195 | - | 1084 | 38.98 | 4.77 | 120.5 | Cell        |
|          |   | -         |   |      |       |      |       | membrane.   |
|          |   | 228533871 |   |      |       |      |       |             |
| ZmPP2C40 | 4 | 232221731 | + | 357  | 38.35 | 5.97 | 38.55 | Chloroplast |
|          |   | -         |   |      |       |      |       | .           |
|          |   | 232231065 |   |      |       |      |       |             |
| ZmPP2C41 | 4 | 237957702 | - | 385  | 43.76 | 6.76 | 41    | Nucleus.    |
|          |   | -         |   |      |       |      |       |             |
|          |   | 237960413 |   |      |       |      |       |             |
| ZmPP2C42 | 4 | 246114806 | - | 290  | 26.65 | 4.52 | 31.21 | Nucleus.    |
|          |   | -         |   |      |       |      |       |             |
|          |   | 246118717 |   |      |       |      |       |             |
| ZmPP2C43 | 5 | 2629765-  | + | 632  | 51.5  | 5.4  | 68.21 | Chloroplast |
|          |   | 2633632   |   |      |       |      |       | .           |
| ZmPP2C44 | 5 | 6892027-  | + | 367  | 44.89 | 9.69 | 40.09 | Nucleus.    |
|          |   | 6894932   |   |      |       |      |       |             |
| ZmPP2C45 | 5 | 39903133- | + | 594  | 49.88 | 4.24 | 61.92 | Nucleus.    |
|          |   | 39909872  |   |      |       |      |       |             |
| ZmPP2C46 | 5 | 63655085- | - | 394  | 49.15 | 8.88 | 43.8  | Nucleus.    |
|          |   | 63659727  |   |      |       |      |       |             |
| ZmPP2C47 | 5 | 82332663- | + | 348  | 31.45 | 4.66 | 37.39 | Chloroplast |
|          |   | 82336140  |   |      |       |      |       | .           |
| ZmPP2C48 | 5 | 93913340- | + | 359  | 33.13 | 5.05 | 39.23 | Nucleus.    |
|          |   | 93920865  |   |      |       |      |       |             |
| ZmPP2C49 | 5 | 144347259 | - | 365  | 39.31 | 6.07 | 39.3  | Chloroplast |
|          |   | -         |   |      |       |      |       | .           |
|          |   | 144352230 |   |      |       |      |       |             |
| ZmPP2C50 | 5 | 157163131 | - | 385  | 44.68 | 6.76 | 41.17 | Nucleus.    |
|          |   | -         |   |      |       |      |       |             |
|          |   | 157165949 |   |      |       |      |       |             |
| ZmPP2C51 | 5 | 163143385 | - | 526  | 37.45 | 7.11 | 55.8  | Chloroplast |
|          |   | -         |   |      |       |      |       | .           |

|          |   |           |   |     |       |       |       |                |  |
|----------|---|-----------|---|-----|-------|-------|-------|----------------|--|
|          |   | 163148831 |   |     |       |       |       |                |  |
| ZmPP2C52 | 5 | 178759459 | - | 470 | 57.89 | 5.92  | 50.8  | Nucleus.       |  |
|          |   | -         |   |     |       |       |       |                |  |
|          |   | 178763854 |   |     |       |       |       |                |  |
| ZmPP2C53 | 5 | 191858823 | - | 322 | 36.08 | 7.94  | 34.33 | Chloroplast    |  |
|          |   | -         |   |     |       |       |       | .              |  |
|          |   | 191861109 |   |     |       |       |       |                |  |
| ZmPP2C54 | 5 | 205611839 | - | 387 | 41.09 | 8.9   | 43.11 | Chloroplast    |  |
|          |   | -         |   |     |       |       |       | .              |  |
|          |   | 205614878 |   |     |       |       |       |                |  |
| ZmPP2C55 | 5 | 206230718 | + | 550 | 51.69 | 5.73  | 62.08 | Chloroplast    |  |
|          |   | -         |   |     |       |       |       | .              |  |
|          |   | 206241041 |   |     |       |       |       |                |  |
| ZmPP2C56 | 6 | 27476632- | - | 431 | 44.19 | 7.44  | 45.09 | Chloroplast    |  |
|          |   | 27483313  |   |     |       |       |       | .              |  |
| ZmPP2C57 | 6 | 93300348- | + | 390 | 50.55 | 9.04  | 43.15 | Nucleus.       |  |
|          |   | 93306754  |   |     |       |       |       |                |  |
| ZmPP2C58 | 6 | 105423342 | + | 365 | 35.36 | 4.78  | 40.08 | Nucleus.       |  |
|          |   | -         |   |     |       |       |       |                |  |
|          |   | 105428237 |   |     |       |       |       |                |  |
| ZmPP2C59 | 6 | 149955406 | + | 419 | 49.46 | 8.89  | 45.53 | Mitochondrion. |  |
|          |   | -         |   |     |       |       |       |                |  |
|          |   | 149959124 |   |     |       |       |       |                |  |
| ZmPP2C60 | 6 | 159266327 | + | 679 | 53.11 | 10.34 | 75.59 | Chloroplast    |  |
|          |   | -         |   |     |       |       |       | .              |  |
|          |   | 159276528 |   |     |       |       |       |                |  |
| ZmPP2C61 | 6 | 173043093 | - | 370 | 39.53 | 5.08  | 39.72 | Nucleus.       |  |
|          |   | -         |   |     |       |       |       |                |  |
|          |   | 173047120 |   |     |       |       |       |                |  |
| ZmPP2C62 | 6 | 178866102 | + | 429 | 47    | 4.85  | 45.4  | Chloroplast    |  |
|          |   | -         |   |     |       |       |       | .              |  |
|          |   | 178869300 |   |     |       |       |       |                |  |
| ZmPP2C63 | 6 | 179555644 | + | 499 | 51.48 | 4.48  | 54.31 | Chloroplast    |  |
|          |   | -         |   |     |       |       |       | .              |  |
|          |   | 179563259 |   |     |       |       |       |                |  |
| ZmPP2C64 | 7 | 19919587- | + | 583 | 51.52 | 7.43  | 63.74 | Chloroplast    |  |
|          |   | 19933729  |   |     |       |       |       | .              |  |
| ZmPP2C65 | 7 | 39226238- | + | 239 | 39.97 | 6.36  | 25.82 | Mitochondrion. |  |
|          |   | 39227878  |   |     |       |       |       |                |  |
| ZmPP2C66 | 7 | 90311008- | - | 360 | 39.03 | 7.03  | 39.03 | Nucleus.       |  |
|          |   | 90325606  |   |     |       |       |       |                |  |
| ZmPP2C67 | 7 | 93421327- | + | 358 | 53.91 | 6.82  | 37.6  | Nucleus.       |  |
|          |   | 93422962  |   |     |       |       |       |                |  |
| ZmPP2C68 | 7 | 131676591 | - | 431 | 46.58 | 6.4   | 47.16 | Chloroplast    |  |

|          |   |           |   |     |       |      |       |                |
|----------|---|-----------|---|-----|-------|------|-------|----------------|
|          |   | -         |   |     |       |      |       | .              |
|          |   | 131681994 |   |     |       |      |       |                |
| ZmPP2C69 | 7 | 151898541 | + | 363 | 37.21 | 4.72 | 39.54 | Nucleus.       |
|          |   | -         |   |     |       |      |       |                |
|          |   | 151904632 |   |     |       |      |       |                |
| ZmPP2C70 | 7 | 160529252 | - | 290 | 28.63 | 6.75 | 31.74 | Nucleus.       |
|          |   | -         |   |     |       |      |       |                |
|          |   | 160538878 |   |     |       |      |       |                |
| ZmPP2C71 | 7 | 167218410 | - | 431 | 44.42 | 5.92 | 46.36 | Chloroplast    |
|          |   | -         |   |     |       |      |       | .              |
|          |   | 167222438 |   |     |       |      |       |                |
| ZmPP2C72 | 7 | 179460272 | - | 352 | 38.57 | 4.78 | 37.24 | Mitochondrion. |
|          |   | -         |   |     |       |      |       |                |
|          |   | 179463998 |   |     |       |      |       |                |
| ZmPP2C73 | 7 | 183528521 | + | 429 | 41.95 | 7.6  | 46.03 | Nucleus.       |
|          |   | -         |   |     |       |      |       |                |
|          |   | 183532791 |   |     |       |      |       |                |
| ZmPP2C74 | 8 | 60211518- | + | 255 | 35.43 | 6.26 | 28.08 | Nucleus.       |
|          |   | 60221459  |   |     |       |      |       |                |
| ZmPP2C75 | 8 | 73727431- | - | 159 | 43.23 | 4.44 | 16.94 | Nucleus.       |
|          |   | 73727910  |   |     |       |      |       |                |
| ZmPP2C76 | 8 | 73966393- | - | 406 | 63.66 | 8.57 | 43.44 | Nucleus.       |
|          |   | 73969285  |   |     |       |      |       |                |
| ZmPP2C77 | 8 | 77866011- | - | 505 | 47.96 | 4.42 | 55    | Chloroplast    |
|          |   | 77878684  |   |     |       |      |       | .              |
| ZmPP2C78 | 8 | 79568849- | + | 423 | 44.71 | 4.84 | 44.9  | Nucleus.       |
|          |   | 79573001  |   |     |       |      |       |                |
| ZmPP2C79 | 8 | 137523807 | - | 508 | 47.15 | 6.33 | 54.39 | Nucleus.       |
|          |   | -         |   |     |       |      |       |                |
|          |   | 137525931 |   |     |       |      |       |                |
| ZmPP2C80 | 8 | 139606577 | + | 391 | 37.54 | 5.53 | 41.77 | Nucleus.       |
|          |   | -         |   |     |       |      |       |                |
|          |   | 139630785 |   |     |       |      |       |                |
| ZmPP2C81 | 8 | 142212025 | + | 473 | 39.87 | 8.79 | 50.38 | Chloroplast    |
|          |   | -         |   |     |       |      |       | .              |
|          |   | 142217746 |   |     |       |      |       |                |
| ZmPP2C82 | 8 | 142405510 | - | 440 | 39.56 | 4.66 | 46.57 | Chloroplast    |
|          |   | -         |   |     |       |      |       | .              |
|          |   | 142412923 |   |     |       |      |       |                |
| ZmPP2C83 | 8 | 148115539 | + | 375 | 45.85 | 7.29 | 40.48 | Nucleus.       |
|          |   | -         |   |     |       |      |       |                |
|          |   | 148123566 |   |     |       |      |       |                |
| ZmPP2C84 | 8 | 151777850 | + | 394 | 60    | 6.61 | 41.71 | Nucleus.       |
|          |   | -         |   |     |       |      |       |                |



|          |    |           |   |      |       |      |        |             |
|----------|----|-----------|---|------|-------|------|--------|-------------|
|          |    | 151782663 |   |      |       |      |        |             |
| ZmPP2C85 | 8  | 175000529 | - | 413  | 52.84 | 6.76 | 43.82  | Nucleus.    |
|          |    | -         |   |      |       |      |        |             |
|          |    | 175002418 |   |      |       |      |        |             |
| ZmPP2C86 | 9  | 109385970 | - | 365  | 34.61 | 4.67 | 40.21  | Nucleus     |
|          |    | -         |   |      |       |      |        |             |
|          |    | 109391305 |   |      |       |      |        |             |
| ZmPP2C87 | 9  | 109598658 | - | 366  | 37.93 | 4.47 | 40.15  | Nucleus.    |
|          |    | -         |   |      |       |      |        |             |
|          |    | 109603762 |   |      |       |      |        |             |
| ZmPP2C88 | 9  | 127296654 | + | 446  | 38.21 | 5.25 | 48     | Nucleus.    |
|          |    | -         |   |      |       |      |        |             |
|          |    | 127301563 |   |      |       |      |        |             |
| ZmPP2C89 | 9  | 127653234 | - | 316  | 31.62 | 6.29 | 33.69  | Chloroplast |
|          |    | -         |   |      |       |      |        | .           |
|          |    | 127654184 |   |      |       |      |        |             |
| ZmPP2C90 | 9  | 132025472 | + | 393  | 45    | 8.48 | 43.6   | Chloroplast |
|          |    | -         |   |      |       |      |        | .           |
|          |    | 132029930 |   |      |       |      |        |             |
| ZmPP2C91 | 9  | 132988328 | - | 1008 | 47.09 | 6.02 | 111.16 | Nucleus.    |
|          |    | -         |   |      |       |      |        |             |
|          |    | 132996488 |   |      |       |      |        |             |
| ZmPP2C92 | 9  | 142637006 | + | 430  | 38.07 | 6.95 | 45.92  | Chloroplast |
|          |    | -         |   |      |       |      |        | .           |
|          |    | 142640717 |   |      |       |      |        |             |
| ZmPP2C93 | 9  | 143668232 | - | 388  | 60.19 | 6.01 | 40.95  | Chloroplast |
|          |    | -         |   |      |       |      |        | .           |
|          |    | 143670483 |   |      |       |      |        |             |
| ZmPP2C94 | 9  | 153924323 | - | 391  | 49.92 | 7.93 | 42.15  | Nucleus.    |
|          |    | -         |   |      |       |      |        |             |
|          |    | 153927090 |   |      |       |      |        |             |
| ZmPP2C95 | 9  | 155700197 | - | 596  | 36.94 | 4.07 | 61.39  | Nucleus.    |
|          |    | -         |   |      |       |      |        |             |
|          |    | 155705998 |   |      |       |      |        |             |
| ZmPP2C96 | 9  | 158229333 | + | 399  | 44.13 | 8.69 | 44.15  | Nucleus.    |
|          |    | -         |   |      |       |      |        |             |
|          |    | 158233704 |   |      |       |      |        |             |
| ZmPP2C97 | 10 | 66549934- | - | 336  | 59.54 | 6.37 | 36.53  | Nucleus.    |
|          |    | 66564838  |   |      |       |      |        |             |
| ZmPP2C98 | 10 | 103573069 | + | 464  | 63.69 | 5.26 | 48.83  | Chloroplast |
|          |    | -         |   |      |       |      |        | .           |
|          |    | 103578268 |   |      |       |      |        |             |
| ZmPP2C99 | 10 | 115576486 | - | 521  | 43.55 | 4.66 | 57.18  | Nucleus.    |
|          |    | -         |   |      |       |      |        |             |

|               |    |                        |   |     |       |      |       |                   |
|---------------|----|------------------------|---|-----|-------|------|-------|-------------------|
| ZmPP2C10<br>0 | 10 | 115581534<br>123473400 | - | 443 | 49.44 | 5.98 | 47.54 | Cell<br>membrane. |
|               |    | -<br>123478449         |   |     |       |      |       |                   |
| ZmPP2C10<br>1 | 10 | 130813394              | + | 365 | 40.32 | 6.42 | 39.86 | Nucleus.          |
|               |    | -<br>130818703         |   |     |       |      |       |                   |
| ZmPP2C10<br>2 | 10 | 143862049              | - | 318 | 40.93 | 8.66 | 34.56 | Nucleus.          |
|               |    | -<br>143866289         |   |     |       |      |       |                   |
| ZmPP2C10<br>3 | 10 | 145825189              | - | 284 | 29.15 | 6.16 | 31.2  | Nucleus.          |
|               |    | -<br>145837613         |   |     |       |      |       |                   |

**Table S2.** Estimates of the divergence style for maize's duplicated PP2C paralogs

| Gene1    | Gene2                    | Ka          | Ks          | Ka_Ks       | Selection<br>pressure  |
|----------|--------------------------|-------------|-------------|-------------|------------------------|
| ZmPP2C05 | ZmPP2C11                 | 0.423919646 | 1.096443202 | 0.386631652 | Purifying<br>selection |
| ZmPP2C04 | ZmPP2C29                 | 0.302249727 | 0.806245259 | 0.374885587 | Purifying<br>selection |
| ZmPP2C09 | ZmPP2C37                 | 0.074529355 | 0.371648009 | 0.20053748  | Purifying<br>selection |
| ZmPP2C10 | ZmPP2C44                 | 0.038169012 | 0.277091725 | 0.137748653 | Purifying<br>selection |
| ZmPP2C11 | ZmPP2C43                 | 0.044313058 | 0.229026555 | 0.193484369 | Purifying<br>selection |
| ZmPP2C01 | ZmPP2C46                 | 0.174363156 | 2.135489862 | 0.081650191 | Purifying<br>selection |
| ZmPP2C04 | ZmPP2C85                 | 0.304972935 | 0.78456759  | 0.388714674 | Purifying<br>selection |
| ZmPP2C01 | ZmPP2C96                 | 0.027201814 | 0.18570984  | 0.146474815 | Purifying<br>selection |
| ZmPP2C08 | ZmPP2C88                 | 0.024936569 | 0.141858508 | 0.175784796 | Purifying<br>selection |
| ZmPP2C05 | Zm00001eb397<br>680_T001 | 0.145729926 | 0.271879609 | 0.536009033 | Purifying<br>selection |
| ZmPP2C06 | ZmPP2C93                 | 0.034702102 | 0.288058781 | 0.120468822 | Purifying<br>selection |
| ZmPP2C07 | ZmPP2C91                 | 0.037790493 | 0.161115712 | 0.234554982 | Purifying<br>selection |
| ZmPP2C97 | ZmPP2C14                 | 0.142214563 | 1.381400977 | 0.102949517 | Purifying<br>selection |

|                 |          |             |             |             |                     |
|-----------------|----------|-------------|-------------|-------------|---------------------|
| ZmPP2C102       | ZmPP2C14 | 0.035989971 | 0.165081486 | 0.218013372 | Purifying selection |
| ZmPP2C99        | ZmPP2C17 | 0.019814263 | 0.151310838 | 0.130950717 | Purifying selection |
| ZmPP2C100       | ZmPP2C16 | 0.028716548 | 0.17558755  | 0.163545469 | Purifying selection |
| ZmPP2C100       | ZmPP2C36 | 0.201263243 | 1.10619562  | 0.181941818 | Purifying selection |
| ZmPP2C100       | ZmPP2C52 | 0.203224846 | 1.090057336 | 0.186435006 | Purifying selection |
| ZmPP2C27        | ZmPP2C33 | 0.091305647 | 0.269341099 | 0.33899634  | Purifying selection |
| ZmPP2C16        | ZmPP2C36 | 0.192169148 | 1.121249844 | 0.171388339 | Purifying selection |
| ZmPP2C15        | ZmPP2C54 | 0.149788736 | 0.937284477 | 0.159811391 | Purifying selection |
| ZmPP2C16        | ZmPP2C52 | 0.208102211 | 1.056224945 | 0.197024518 | Purifying selection |
| Zm00001eb107120 | ZmPP2C71 | 0.127211179 | 0.497846226 | 0.255523036 | Purifying selection |
| ZmPP2C25        | ZmPP2C72 | 0.069486265 | 0.260214915 | 0.267034137 | Purifying selection |
| ZmPP2C26        | ZmPP2C73 | 0.02001699  | 0.183831163 | 0.108887904 | Purifying selection |
| ZmPP2C21        | ZmPP2C67 | 0.058137202 | 0.20573101  | 0.282588424 | Purifying selection |
| ZmPP2C20        | ZmPP2C64 | 0.050940059 | 0.200919447 | 0.253534739 | Purifying selection |
| ZmPP2C31        | ZmPP2C61 | 0.290339744 | 1.364172008 | 0.21283221  | Purifying selection |
| ZmPP2C29        | ZmPP2C85 | 0.03762902  | 0.175694989 | 0.214172415 | Purifying selection |
| ZmPP2C30        | ZmPP2C76 | 0.254145745 | 0.729474364 | 0.348395719 | Purifying selection |
| ZmPP2C30        | ZmPP2C84 | 0.065456544 | 0.20849435  | 0.313948764 | Purifying selection |
| ZmPP2C31        | ZmPP2C82 | 0.032159823 | 0.185013593 | 0.173824112 | Purifying selection |
| ZmPP2C36        | ZmPP2C52 | 0.02653372  | 0.178502849 | 0.148645919 | Purifying selection |
| Zm00001eb185410 | ZmPP2C53 | 0.456261657 | 0.727032902 | 0.627566725 | Purifying selection |
| ZmPP2C40        | ZmPP2C49 | 0.027115185 | 0.221153838 | 0.122607798 | Purifying selection |

|          |          |             |             |             |                     |
|----------|----------|-------------|-------------|-------------|---------------------|
| ZmPP2C41 | ZmPP2C50 | 0.173175001 | 0.339671375 | 0.509831013 | Purifying selection |
| ZmPP2C42 | ZmPP2C47 | 0.022167219 | 0.189352473 | 0.117068546 | Purifying selection |
| ZmPP2C40 | ZmPP2C77 | 0.274283391 | 1.482834647 | 0.184972338 | Purifying selection |
| ZmPP2C48 | ZmPP2C58 | 0.118292946 | 1.039633759 | 0.113783287 | Purifying selection |
| ZmPP2C46 | ZmPP2C57 | 0.015385155 | 0.18509215  | 0.083121596 | Purifying selection |
| ZmPP2C54 | ZmPP2C90 | 0.3933866   | 2.639743615 | 0.149024548 | Purifying selection |
| ZmPP2C55 | ZmPP2C91 | 0.44617599  | 2.385674954 | 0.187022959 | Purifying selection |
| ZmPP2C48 | ZmPP2C86 | 0.116475057 | 0.947829191 | 0.122886126 | Purifying selection |
| ZmPP2C62 | ZmPP2C78 | 0.048739116 | 0.181881644 | 0.267971607 | Purifying selection |
| ZmPP2C63 | ZmPP2C77 | 0.061202395 | 0.226204474 | 0.270562265 | Purifying selection |
| ZmPP2C61 | ZmPP2C80 | 0.058141994 | 0.340544188 | 0.170732598 | Purifying selection |
| ZmPP2C76 | ZmPP2C84 | 0.253277957 | 0.789100001 | 0.320970671 | Purifying selection |
| ZmPP2C77 | ZmPP2C83 | 0.210999515 | 0.917678039 | 0.229927606 | Purifying selection |

**Table S3.** Functionally annotated cis-elements identified in the promoters of 13 *ZmPP2Cs*

| Cis-Element   | Functions of Cis-Elements | Number of Genes |
|---------------|---------------------------|-----------------|
| ACA-motif     | light responsiveness      | 6               |
| ACE           | light responsiveness      | 1               |
| ATC-motif     | light responsiveness      | 2               |
| ATCT-motif    | light responsiveness      | 19              |
| Box 4         | light responsiveness      | 10              |
| G-box         | light responsiveness      | 14              |
| MRE           | light responsiveness      | 66              |
| Box II        | light responsive          | 96              |
| chs-CMA1a     | light responsive          | 33              |
| chs-CMA2a     | light responsive          | 1               |
| chs-CMA2b     | light responsive          | 8               |
| chs-CMA2c     | light responsive          | 8               |
| chs-Unit 1 m1 | light responsive          | 1               |

|                    |                                         |    |
|--------------------|-----------------------------------------|----|
| GA-motif           | light responsive                        | 1  |
| Gap-box            | light responsive                        | 5  |
| GATA-motif         | light responsive                        | 15 |
| GT1-motif          | light responsive                        | 1  |
| I-box              | light responsive                        | 40 |
| LAMP-element       | light responsive                        | 10 |
| L-box              | light responsive                        | 42 |
| 3-AF1 binding site | light responsive                        | 40 |
| AAAC-motif         | light responsive                        | 10 |
| Pc-CMA2a           | light responsive                        | 1  |
| Pc-CMA2c           | light responsive                        | 2  |
| Sp1                | light responsive                        | 78 |
| TCCC-motif         | light responsive                        | 40 |
| TCT-motif          | light responsive                        | 44 |
| AT1-motif          | light responsive                        | 4  |
| GTGGC-motif        | light responsive                        | 7  |
| AE-box             | light response                          | 24 |
| CAG-motif          | light response                          | 1  |
| LTR                | low-temperature responsiveness          | 53 |
| MBS                | drought-inducibility                    | 58 |
| TC-rich repeats    | defense and stress responsiveness       | 31 |
| WUN-motif          | wound-responsive                        | 21 |
| GC-motif           | anoxic specific inducibility            | 62 |
| circadian          | circadian control                       | 9  |
| MBSI               | flavonoid biosynthetic genes regulation | 8  |
| O2-site            | zein metabolism regulation              | 43 |
| ARE                | anaerobic induction                     | 77 |
| AACA_motif         | endosperm-specific negative expression  | 1  |
| CAT-box            | meristem expression                     | 61 |
| HD-Zip 1           | palisade mesophyll cells                | 7  |
| motif I            | root specific                           | 4  |
| MSA-like           | cell cycle regulation                   | 8  |
| NON-box            | meristem specific activation            | 1  |
| RY-element         | seed-specific regulation                | 11 |
| AuxRE              | auxin-responsive                        | 1  |
| AuxRR-core         | auxin responsiveness                    | 14 |
| TGA-box            | auxin-responsive                        | 4  |
| TGA-element        | auxin-responsive element                | 56 |
| TGACG-motif        | MeJA-responsiveness                     | 88 |
| CGTCA-motif        | MeJA-responsiveness                     | 88 |
| ABRE               | abscisic acid responsiveness            | 98 |
| GARE-motif         | gibberellin-responsive                  | 29 |
| P-box              | gibberellin-responsive                  | 36 |
| TATC-box           | gibberellin-responsiveness              | 14 |

|             |                               |    |
|-------------|-------------------------------|----|
| TCA-element | salicylic acid responsiveness | 35 |
| CCAAT-box   | MYBHv1 binding site           | 57 |
| Box III     | protein binding site          | 4  |
| HD-Zip 3    | protein binding site          | 3  |

**Table S4.** The primers for qRT-PCR.

| Gene name | Primer name     | primer sequence (5'-3') | Product length (bp) |
|-----------|-----------------|-------------------------|---------------------|
| ZmPP2C19  | RT-ZmPP2C19-F1  | GCCTAAACCTGACGAAGATG    | 101                 |
|           | RT-ZmPP2C19-R1  | ACTTGTCGAAGGAATCCAAAT   |                     |
| ZmPP2C37  | RT-ZmPP2C37-F-3 | CAGGGATTGGACCTTGTAAT    | 93                  |
|           | RT-ZmPP2C37-R-3 | GAGTTGCAGAGCAGTTAGAT    |                     |
| ZmPP2C41  | RT-ZmPP2C41-F-1 | CAGGAACTGTCCTACCAATTAC  | 94                  |
|           | RT-ZmPP2C41-R-1 | GTGGTTGCTGTGCATTTATC    |                     |
| ZmPP2C50  | RT-ZmPP2C50-F-1 | GAACGTGGTGTACGTGATG     | 156                 |
|           | RT-ZmPP2C50-R-1 | AATCCCTGGCAGAGTATGA     |                     |
| ZmPP2C54  | RT-ZmPP2C54-F-1 | GACCTCAGGAAAGTTGAGAAG   | 101                 |
|           | RT-ZmPP2C54-R-1 | GTATCCCTCTCTTGCAAGTATC  |                     |
| ZmPP2C69  | RT-ZmPP2C69-F-1 | TGCCAACCTCTCTCCATAAA    | 92                  |
|           | RT-ZmPP2C69-R-1 | CTTATCTCCCAGCTCAGTTAGT  |                     |
| ZmPP2C71  | RT-ZmPP2C71-F4  | GCAGAACGGATCAAGAAGT     | 142                 |
|           | RT-ZmPP2C71-R4  | CATAATCCTTGAGGCAGAAGT   |                     |
| ZmPP2C75  | RT-ZmPP2C75-F-2 | GTTCGAGACCATGGACAG      | 166                 |
|           | RT-ZmPP2C75-R-2 | CTTCAGGTAGCACGTCTC      |                     |
| ZmPPC81   | RT-ZmPP2C81-F-1 | GAACACAGGGTTGAAGATACT   | 121                 |
|           | RT-ZmPP2C81-R-1 | GATCCCTGTCCATCACATAAA   |                     |
| ZmPP2C85  | RT-ZmPP2C85-F-1 | CTGCGAAGAAGCCAAGTC      | 140                 |
|           | RT-ZmPP2C85-R-1 | GGAACCTCCTCATCTCCAA     |                     |
| ZmEIF1    | ZmEIF1-F        | GCCGCCAAGAAGAAATGATGC   | 220                 |
|           | ZmEIF1-R        | CGCCAAAAGGAGAAATACAAG   |                     |
